# Supplementary material for: Protein degradation rate is the dominant mechanism accounting for the differences in protein abundance of basal p53 in a human breast and colorectal cancer cell line
Source: PubMed Central journal article supplement (PMC5425217; doi:10.1371/journal.pone.0177336), 2017-05-10
Supplement: pone.0177336.s001.pdf [file pone.0177336.s001.pdf]

|                    | $k_1$   | $k_2$        | $k_3$   | $s_1$  | $s_2$  |
|--------------------|---------|--------------|---------|--------|--------|
| Data I – repeat 1  | [1, 20] | [5e5, 1.2e7] | [0, 22] | [0, 6] | [0, 2] |
| Data I – repeat 2  | [1, 20] | [5e5, 1.2e7] | [0, 35] | [0, 6] | [0, 2] |
| Data I – repeat 3  | [1, 10] | [2e6, 1.2e7] | [0, 28] | [0, 6] | [0, 2] |
| Data II – repeat 1 | [0, 18] | [5e5, 1e7]   | [0, 15] | [0, 4] | [0, 2] |
| Data II – repeat 2 | [0, 15] | [1e6, 1e7]   | [0, 12] | [0, 4] | [0, 2] |
| Data II – repeat 3 | [0, 10] | [2e6, 1e7]   | [0, 15] | [0, 4] | [0, 2] |
