# Supplementary material for: Protein degradation rate is the dominant mechanism accounting for the differences in protein abundance of basal p53 in a human breast and colorectal cancer cell line
Source: PubMed Central journal article supplement (PMC5425217; doi:10.1371/journal.pone.0177336), 2017-05-10
Supplement: pone.0177336.s002.pdf [file pone.0177336.s002.pdf]

|                          | $k_1$ | $k_2$ | $k_3$ | $k_{mna\ deg}$ |
|--------------------------|-------|-------|-------|----------------|
| MCF7                     | 30    | 5e6   | 30    | 5              |
| BE - transcription       | 248   | 5.3e6 | 28    | 4.8            |
| BE - translation         | 31    | 1.6e7 | 28    | 4.8            |
| BE – protein degradation | 31    | 5.3e6 | 5.6   | 4.8            |
