# Supplementary material for: Protein degradation rate is the dominant mechanism accounting for the differences in protein abundance of basal p53 in a human breast and colorectal cancer cell line
Source: PubMed Central journal article supplement (PMC5425217; doi:10.1371/journal.pone.0177336), 2017-05-10

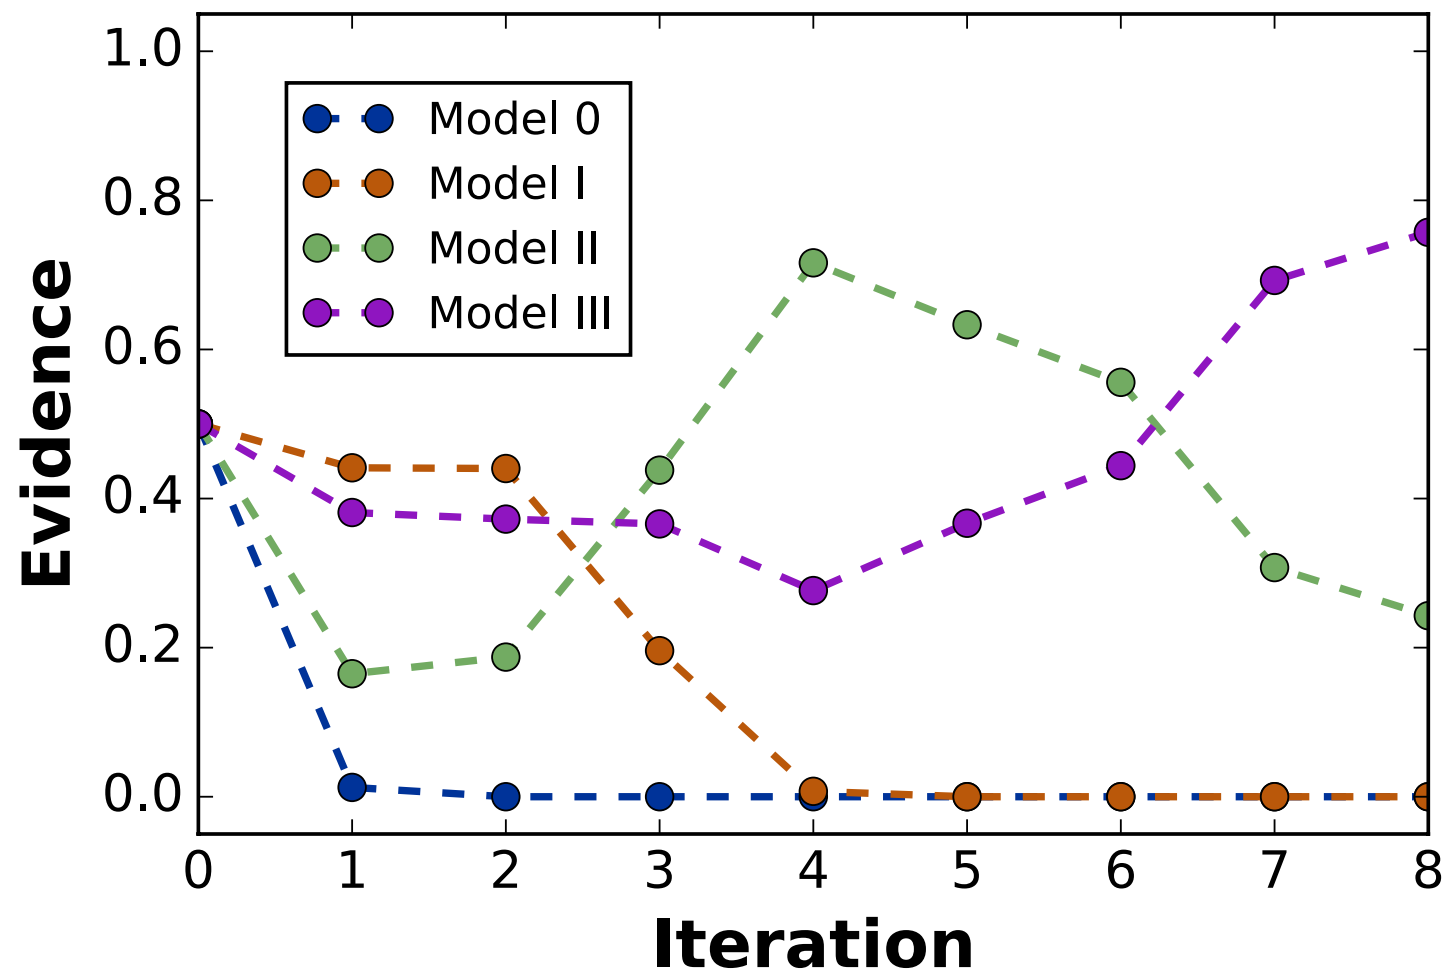

Supplement: pone.0177336.s008.pdf [file pone.0177336.s008.pdf]
